# Supplementary material for: Application of Cyclized Polyacrylonitrile for Ultrafiltration Membrane Fouling Mitigation
Source: MDPI journal article supplement (doi:10.3390/membranes12050489), 2022-04-30
Supplement: s1 [file s1]

## Supplementary Materials

# Application of Cyclized Polyacrylonitrile for Ultrafiltration Membrane Fouling Mitigation

Alexandra Pulyalina <sup>1,\*</sup>, Nadezhda Tian <sup>1</sup>, Anna Senchukova <sup>1</sup>, Ilya Faykov <sup>1</sup>, Maria Ryabikova <sup>1</sup>, Alexander Novikov <sup>1</sup>, Natalia Saprykina <sup>2</sup> and Galina Polotskaya <sup>1,2</sup>

<sup>1</sup> Institute of Chemistry, Saint Petersburg State University, Saint Petersburg 198504, Russia; tyan-nadezhda91@yandex.ru (N.T.); st024726@student.spbu.ru (A.S.); st022544@student.spbu.ru (I.F.); st069152@student.spbu.ru (M.R.); a.s.novikov@spbu.ru (A.N.); polotskaya@hq.macro.ru (G.P.)

<sup>2</sup> Institute of Macromolecular Compounds, Russian Academy of Sciences, Saint Petersburg 199004, Russia; saprykina@hq.macro.ru

\* Correspondence: a.pulyalina@spbu.ru; Tel.: +78-124-284-805

**Table S1.** Calculated enthalpies, entropies, and Gibbs free energies (in Hartree) for optimized equilibrium model structures (H, S, and G, respectively).

| Model Structure | H        | G        | S       |
|-----------------|----------|----------|---------|
| PAI             | 0.319999 | 0.218247 | 214.155 |
| m-PAN           | 0.445113 | 0.371262 | 155.434 |
| A               | 0.752333 | 0.594360 | 332.484 |
| B               | 0.751947 | 0.598635 | 322.672 |
| C               | 0.748442 | 0.593602 | 325.889 |
| D               | 0.738990 | 0.588033 | 317.716 |
